# Supplementary material for: G-protein-coupled receptors mediate ω-3 PUFAs-inhibited colorectal cancer by activating the Hippo pathway
Source: PubMed Central journal article supplement (PMC5295433; doi:10.18632/oncotarget.11089), 2016-08-05
Supplement: oncotarget-07-58315-s001.pdf [file oncotarget-07-58315-s001.pdf]

# G-protein-coupled receptors mediate $\omega$ -3 PUFAs-inhibited colorectal cancer by activating the Hippo pathway

## SUPPLEMENTARY FIGURES AND TABLES

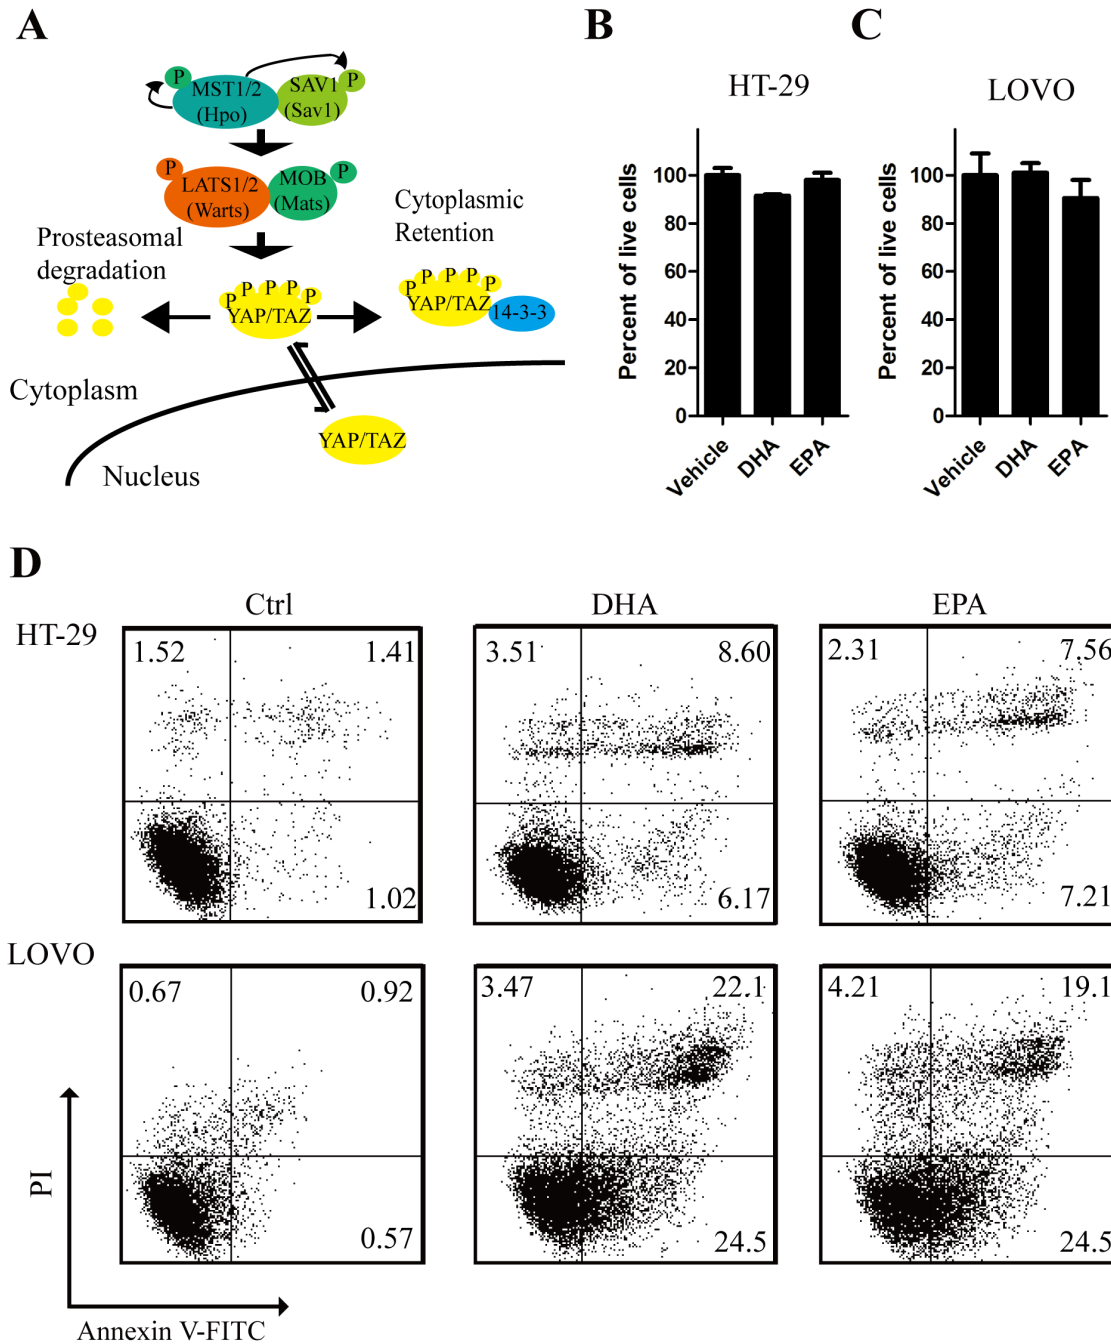

**Supplementary Figure S1: DHA and EPA induce apoptosis of CRC cells.** **A.** The schematic of the components of the Hippo pathway. **B and C.** HT-29 (B) and LOVO (C) cells growing in medium were treated with 100  $\mu$ M either DHA or EPA, respectively, for 6 h and subsequently trypan blue staining was performed. The cell numbers were counted to measure the viability. Treatment with ethanol was used as a vehicle control. **D.** HT-29 and LOVO cells were treated with 75  $\mu$ M DHA or EPA for 24 h, cell apoptosis was determined by FACS analysis. The data are expressed as the mean  $\pm$  SEM for triplicate experiments. \* $P$ <0.05.

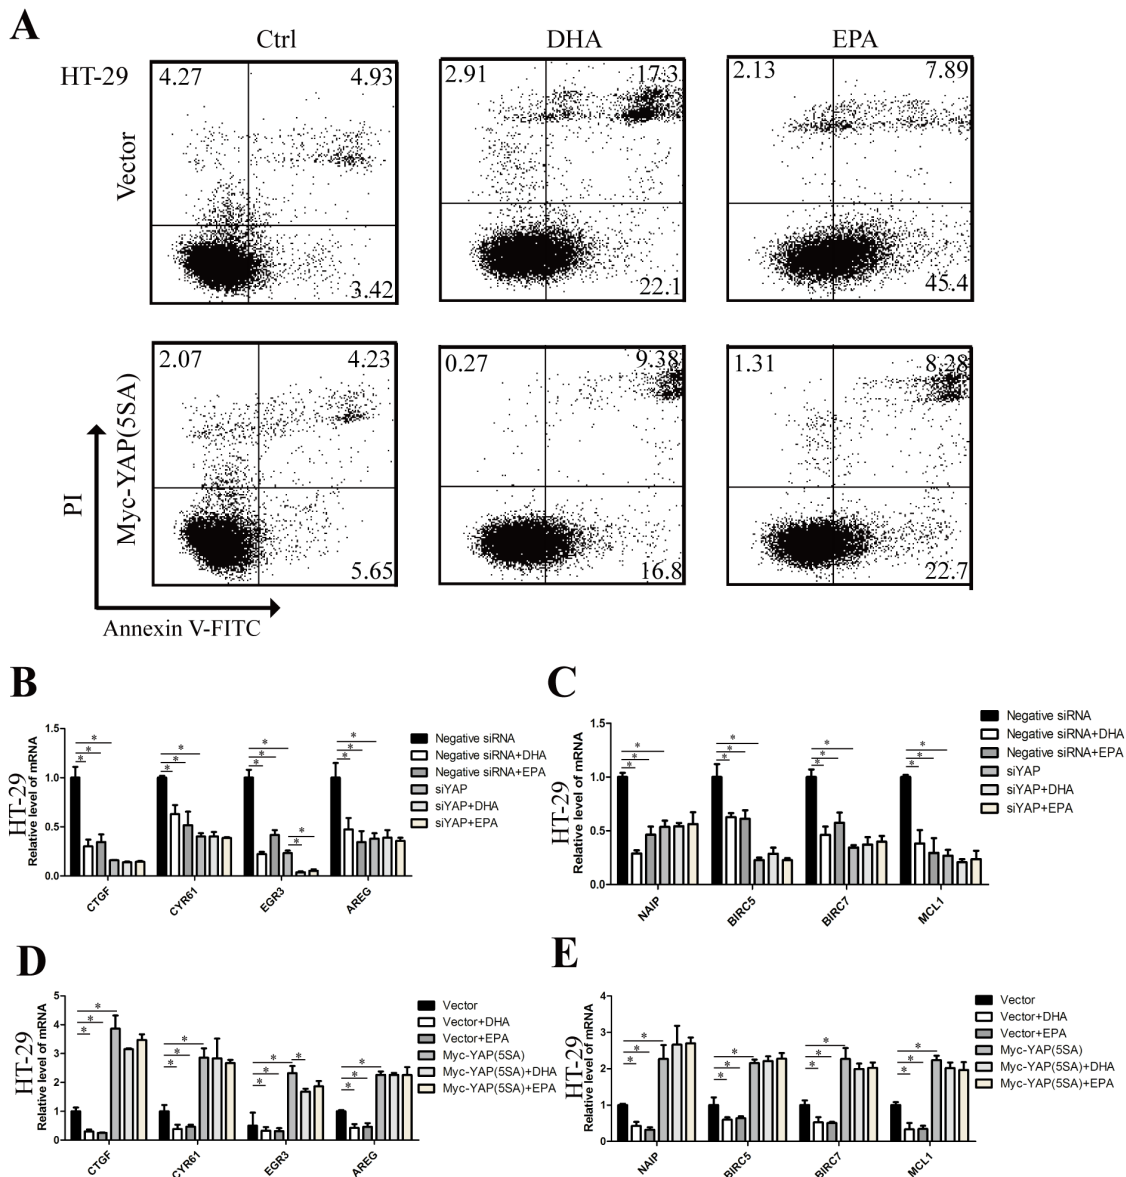

**Supplementary Figure S2:  $\omega$ -3 PUFAs inhibit proliferation and induce apoptosis of HT-29 cells via YAP.** **A.** HT-29 cells were infected with empty vector or pQCXIH Myc-YAP (5SA) retroviral for 72 h. After infection, cells were treated with 75  $\mu$ M DHA or EPA for additional 48 h, cell apoptosis was determined by FACS analysis. **B** and **C.** HT-29 cells were transfected with YAP siRNA for 48 h. After transfection, cells were treated with 75  $\mu$ M DHA or EPA for additional 24 h. Total RNA was extracted and used for qRT-PCR analysis of the representative panel of pro-proliferative genes and anti-apoptosis genes. **D** and **E.** HT-29 cells were infected with empty vector or pQCXIH Myc-YAP (5SA) retroviral for 72 h. After infection, cells were treated with 75  $\mu$ M DHA or EPA for additional 24 h. Total RNA was extracted and used for qRT-PCR analysis of the representative panel of pro-proliferative genes and anti-apoptosis genes. The data are expressed as the mean  $\pm$  SEM for triplicate experiments. \* $P$ <0.05.

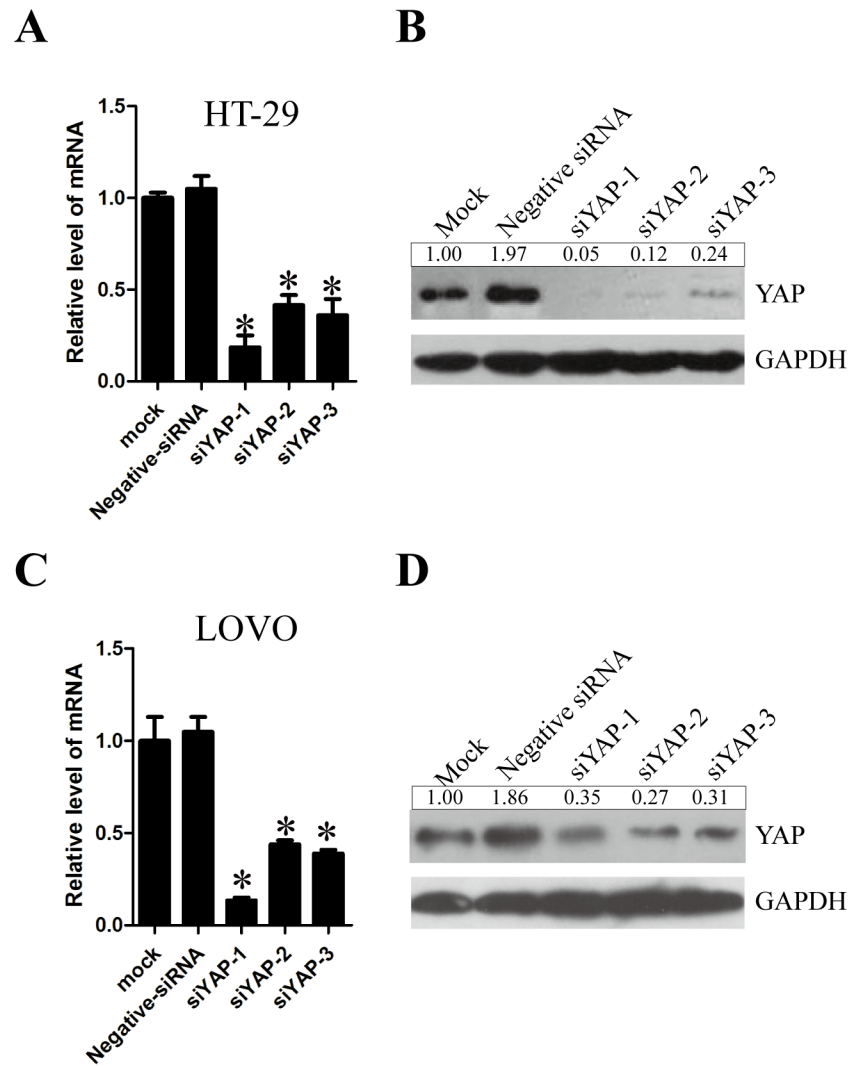

**Supplementary Figure S3: The knockdown efficiency of YAP in CRC cells. A-D.** The YAP knockdown was achieved by the transfection of the cells with YAP-targeting siRNAs sequence. The HT-29 (A and B) and LOVO (C and D) cells were either transfected with the negative control or the YAP-targeting siRNAs for 48 h and then the mRNA and protein were prepared for qRT-PCR analysis and western blot. The data are expressed as the mean  $\pm$  SEM for triplicate experiments. \* $P$ <0.05.

**Supplementary Table S1: Serum and colon mucosa fatty acid composition in control and  $\omega$ -3 PUFAs group mice (weight % of total fatty acids)**

| PUFA                | Control    | $\omega$ -3 PUFAs |
|---------------------|------------|-------------------|
| <i>Serum</i>        |            |                   |
| LNA (18:2 n-6)      | 15.63±0.56 | 3.48±0.49**       |
| AA (20:4 n-6)       | 11.34±0.84 | 8.76±2.03*        |
| DTA (22:4 n-6)      | 0.06±0.03  | 0.17±0.03**       |
| EPA (20:5 n-3)      | 0.16±0.05  | 6.24±1.27**       |
| DPA (22:5 n-3)      | 0.23±0.07  | 0.37±0.18*        |
| DHA (22:6 n-3)      | 4.53±1.72  | 13.34±3.26**      |
| <i>Colon mucosa</i> |            |                   |
| LNA (18:2 n-6)      | 13.82±1.13 | 1.21±0.19**       |
| AA (20:4 n-6)       | 7.36±1.35  | 4.48±1.17*        |
| DTA (22:4 n-6)      | 1.07±0.22  | 0.64±0.17*        |
| EPA (20:5 n-3)      | 0.43±0.16  | 5.47±1.63**       |
| DPA (22:5 n-3)      | 0.46±0.08  | 0.79±0.31*        |
| DHA (22:6 n-3)      | 1.53±0.43  | 12.35±1.93**      |

Values are means  $\pm$  SEM, n=5 mice per group. \*\*\*indicate statistically significant differences with  $P<0.05$  and  $P<0.01$ , respectively, compared to the control group.

Supplementary Table S2: The sequences of primers for real-time PCR

|                        | antisense                | sense                      |
|------------------------|--------------------------|----------------------------|
| GAPDH (human)          | GGCATGGACTGTGGTCATGAG    | TGCACCACCAACTGCTTAGC       |
| YAP (human)            | CCAGGAATGGCTTCAAGGTA     | CTCGAACCCCAGATGACTTC       |
| GPR120 (human)         | CTGTGCAGGAATGAGTGGAAAG   | CTGATGGAGGGTACTGGAAATG     |
| GPR40 (human)          | GTCTGGTCTTTGGGTTGGAG     | GCAGGAGAGAGAGGGCTGAAG      |
| CTGF (human)           | CTTGTGGCAAGTGAATTTCC     | TGCTTTGAACGATCAGACAA       |
| Cyr61 (human)          | AGCCTCGCATCCTATAACAACC   | TTCTTTTACAAGGCGGCACTC      |
| AREG (human)           | GTCATAGCCATAAATGATGAGTCG | AAATACTTTTTTACCTTCGTGCACC  |
| EGR3 (human)           | GCAGCGACCACCTCACCAC      | CCGCTTCTTCTCCTTTTGT        |
| NAIP (human)           | ACGAGACTCCCCATAGAAGAC    | CTTCACCCTTATGTCGTACTIONTGG |
| BIRC5 (human)          | AACAGCCGAGATGACCTCC      | AACTTCAGGTGGATGAGGAGAC     |
| BIRC7 (human)          | GGCTCTGAGGAGTTGCGTC      | AGGCCCCCATAGCAGAAGA        |
| MCL1 (human)           | AGACGATGTGAAATCG         | TAAC TAGCCAGTCCCG          |
| $\beta$ -actin (mouse) | ATGCCACAGGATTCCATACCCAA  | CTCTAGACTTCGAGCAGGAGATGG   |
| GAPDH (mouse)          | TCAACAGCAACTCCCCTCTTCCA  | TTGTCATTGAGAGCAATGCCAGCC   |
| CTGF (mouse)           | TCAACCTCAGACACTGGTTTCG   | TAGAGCAGGTCTGTCTGCAAGC     |
| Cyr61 (mouse)          | AATACCGGCCCAAATACTGC     | ATCTCTCCATCTTCGCATCG       |
| AREG (mouse)           | AGTGCTGTTGCTGCTGGTC      | TCGCTTATGGTGGAAACCTC       |
| EGR3 (mouse)           | CCACCTCACCCTCACATCC      | CTTGAGGTGGATCTTGGCGT       |
| NAIP (mouse)           | GGAGCCTGACTGAACTGAAGAA   | GCAGAGAGCTCAGGGAGAAAT      |
| BIRC5 (mouse)          | ATAGAAAGCACTCCCCTGGC     | TTGAAGCACCCCTTCTGAGC       |
| BIRC7 (mouse)          | AGATGTCCAGCCACCTCTAGT    | AGAGTCCCTCAAGGCAAGTC       |
| MCL1 (mouse)           | GACTTGAAGCTGCCCAGGATT    | TGGCCTCTCAGTGTGTTGCTG      |

Supplementary Table S3: The sequences of siRNAs

| Name           | Forward 5' - 3'        | Reverse 5' - 3'       |
|----------------|------------------------|-----------------------|
| siYAP-1#       | GACGACCAAUAGCUCAGAUTT  | AUCUGAGCUAUUGGUCGUCTT |
| siYAP-2#       | GGUGAUACUAUCAACCAAATT  | UUUGGUUGAUAGUAUCACCTT |
| siYAP-3#       | CUGCCACCAAGCUAGAUAAATT | UUAUCUAGCUUGGUGGCAGTT |
| siLATS1-1#     | GGUAGUUCGUCUAUAUUAUTT  | AUAAUAUAGACGAACYACCTT |
| siLATS1-2#     | GAGCUGGAAAGGUUCUAAATT  | UUUAGAACCUUCCAGCUCTT  |
| siLATS1-3#     | GGUUGGGACUCCCAAUUAUTT  | AUAAUUGGGAGUCCCAACCTT |
| siMST1-1#      | GAGCUAUGGUCAGAUAACTT   | AGUUAUCUGACCAUAGCUCTT |
| siMST1-2#      | GACAGAUGGAGCCAAUACUTT  | AGUAUUGGCUCCAUCAGUCTT |
| SiMST2-1#      | GCCCAUAUGUUGUAAAAGUATT | UACUUUACAACAUAUGGGCTT |
| SiMST2-2#      | GCUGGUCAGUUAACAGAUATT  | UAUCUGUUAACUGACCAGCTT |
| SiMST2-3#      | CCCACAAAUCCACCACCAATT  | UUGGUGGUGGAUUUGUGGGTT |
| SiGPR40-1#     | CCACUUCUCCCACUCUAUTT   | AUAGAGUGGGAAGAAGUGGTT |
| siGPR40-2#     | UUGACCGGUGUGUUGAUGCTT  | GCAUCAACACACCGGUCAATT |
| siGPR40-3#     | CCUGGAGUGUGGUGCUUAATT  | UUAAGCACACACUCCAGGTT  |
| SiGPR120-1#    | GCCUUCACAUUUGCUAAUUTT  | AAUUAGCAAAUGUGAAGGCTT |
| SiGPR120-2#    | AAGAGGUUGAGUACCAGGCTT  | GCCUGGUACUCAACCUCUUTT |
| SiGPR120-3#    | AUUAGCAAAUGUGAAGGCCTT  | GGCCUUCACAUUUGCUAAUTT |
| Negative siRNA | UUCUCCGAACGUGUCACGUTT  | ACGUGACACGUUCGGAGAATT |
